# Supplementary material for: Infection of rhesus macaques with a pool of simian immunodeficiency virus with the envelope genes from acute HIV-1 infections
Source: PubMed Central journal article supplement (PMC5124249; doi:10.1186/s12981-016-0125-8), 2016-11-25

Supplementary figure 1.

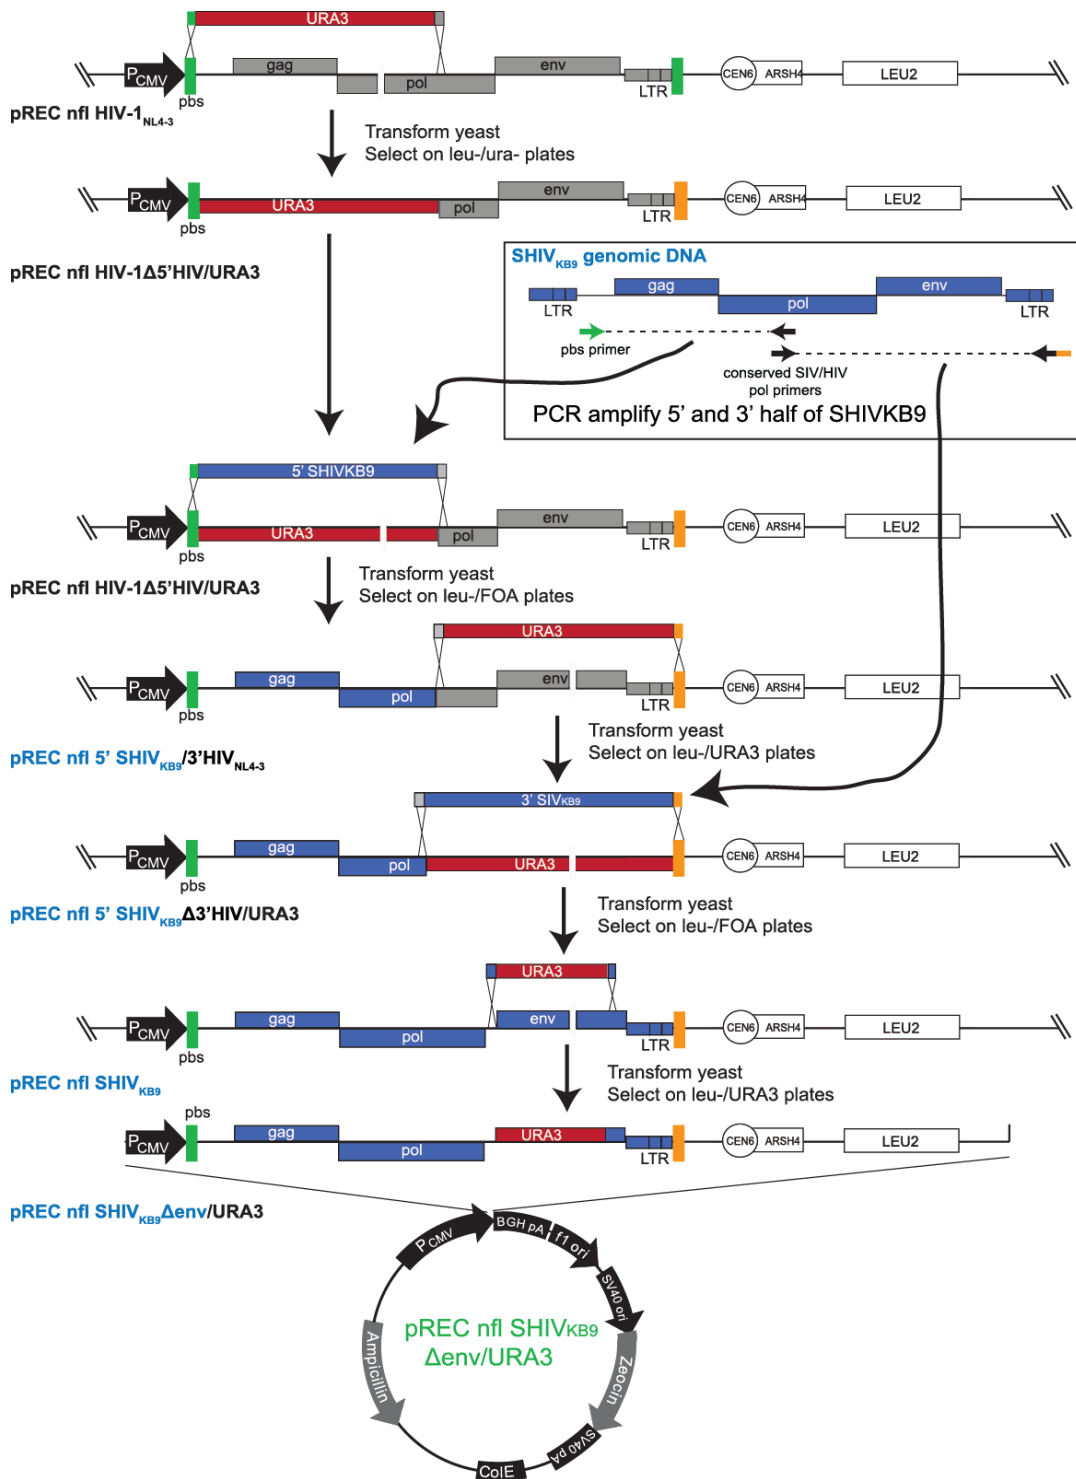

Supplement: 12981_2016_125_MOESM1_ESM.pdf [file 12981_2016_125_MOESM1_ESM.pdf]
